# Supplementary material for: The Alexipharmic Mechanisms of Five Licorice Ingredients Involved in CYP450 and Nrf2 Pathways in Paraquat-Induced Mice Acute Lung Injury
Source: Hindawi journal article supplement (doi:10.1155/2019/7283104), 2019-04-28
Supplement: f1 [file 7283104.f1.zip]

Supplementary Table 5. Real-Time PCR primers sequences

| Gene   | Sequence of Primers                                                                        | Annealing Temperature/°C | Cycle |
|--------|--------------------------------------------------------------------------------------------|--------------------------|-------|
| GAPDH  | forward, 5'gaa ggt gat gga tga gaa gtt-3',<br>reverse, 5'-gtg gag gag ggt gtt ggt gta-3';  | 62                       | 30    |
| Nrf-2  | forward, 5'-ggg tat gga aga gga gat tg-3',<br>reverse, 5'-agt ggt tgg ggt gtt gtg tg-3';   | 58.8                     | 30    |
| GPX    | forward, 5'-ggg ggg tgg tgg tgg tgg ggt-3',<br>reverse, 5'-gaa tgg tgt gga agg ggg ggg-3'; | 67.7                     | 30    |
| CYP3A4 | forward, 5'-gga tga aga atg gaa gag-3',<br>reverse, 5'-tgg aga tga ggg tga gtg-3';         | 54                       | 30    |
| NQO1   | forward, 5'-aga gtg gga ttg tgg att tgt g3',<br>reverse, 5'-gtg gag tgt ggg gaa tgg ta3';  | 58.7                     | 30    |
| GCLM   | forward, 5'-gag aaa aga gag ttg gaa gag g3',<br>reverse, 5'-gag tga aat gtg ggt gga tg3'.  | 58                       | 30    |
