# Supplementary material for: The Alexipharmic Mechanisms of Five Licorice Ingredients Involved in CYP450 and Nrf2 Pathways in Paraquat-Induced Mice Acute Lung Injury
Source: Hindawi journal article supplement (doi:10.1155/2019/7283104), 2019-04-28
Supplement: f1 [file 7283104.f1.zip]

Supplementary Table 1. The ingredients of OB $\geq$ 30% and DL $\geq$ 0.1 in licorice and have nodes in Agilent Literature Search.

| Mol ID    | Molecule Name     | Nodes |
|-----------|-------------------|-------|
| MOL003656 | Lupiwighteone     | 3     |
| MOL000417 | Calycosin         | 60    |
| MOL000422 | Kaempferol        | 202   |
| MOL004328 | Naringenin        | 233   |
| MOL004806 | Euchrenone        | 2     |
| MOL004841 | Licochalcone B    | 10    |
| MOL004879 | Glycyrin          | 4     |
| MOL004908 | Glabridin         | 85    |
| MOL000098 | Quercetin         | 222   |
| MOL000497 | LCA               | 110   |
| MOL001789 | Isoliquiritigenin | 169   |
| MOL002311 | GLL               | 13    |
| MOL002565 | Medicarpin        | 33    |
| MOL002844 | Pinocembrin       | 67    |
| MOL000354 | Isorhamnetin      | 127   |
| MOL000359 | Sitosterol        | 96    |
| MOL000392 | Formononetin      | 111   |
| MOL004985 | Icos-5-enoic acid | 291   |
| MOL005016 | Odoratin          | 2     |
| MOL004957 | Isoformononetin   | 2     |
| MOL001792 | Liquiritigenin    | 65    |
