# Supplementary material for: The Alexipharmic Mechanisms of Five Licorice Ingredients Involved in CYP450 and Nrf2 Pathways in Paraquat-Induced Mice Acute Lung Injury
Source: Hindawi journal article supplement (doi:10.1155/2019/7283104), 2019-04-28
Supplement: f1 [file 7283104.f1.zip]

Supplementary Table 4. Molecular docking score for ingredients have strongly energy binding to CYP3A4.

| Molecule Name  | Structure                                                                           | Score (docking of CYP3A4) |
|----------------|-------------------------------------------------------------------------------------|---------------------------|
| GLL            | 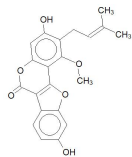   | 4.7912                    |
| LCA            |    | 6.0907                    |
| LIA            |    | 5.6487                    |
| ILF            |    | 6.0287                    |
| 18 $\beta$ -GA |  | 4.4983                    |
| carbamazepine  |  | 4.3030                    |
| Dexamethasone  |  | 4.3246                    |
