# Supplementary material for: The Alexipharmic Mechanisms of Five Licorice Ingredients Involved in CYP450 and Nrf2 Pathways in Paraquat-Induced Mice Acute Lung Injury
Source: Hindawi journal article supplement (doi:10.1155/2019/7283104), 2019-04-28
Supplement: f1 [file 7283104.f1.zip]

Supplementary Table 3. Active compounds

| Mol ID    | Molecule Name                                                                                       | OB (%) | DL   | Classification | Structure |
|-----------|-----------------------------------------------------------------------------------------------------|--------|------|----------------|-----------|
| MOL002311 | GLL                                                                                                 | 90.78  | 0.67 | Coumarin       |           |
| MOL004904 | Llicopyranocoumarin                                                                                 | 80.36  | 0.65 | Coumarin       |           |
| MOL004863 | 3-(3,4-dihydroxyphenyl)-5,7-dihydroxy-8-(3-methylbut-2-enyl) Chromone                               | 66.37  | 0.41 | Isoflavones    |           |
| MOL004855 | Licoricone                                                                                          | 63.58  | 0.47 | Isoflavones    |           |
| MOL005000 | Gancaonin G                                                                                         | 60.44  | 0.39 | Isoflavones    |           |
| MOL004824 | (2S)-6-(2,4-dihydroxyphenyl)-2-(2-hydroxypropan-2-yl)-4-methoxy-2,3-dihydrofuro[3,2-g]chromen-7-one | 60.25  | 0.63 | Coumarin       |           |
| MOL004849 | 3-(2,4-dihydroxyphenyl)-8-(1,1-dimethylprop-2-enyl)-7-hydroxy-5-methoxy-coumarin                    | 59.62  | 0.43 | Coumarin       |           |
| MOL004879 | Glycyrin                                                                                            | 52.61  | 0.47 | Coumarin       |           |
| MOL004912 | Glabrone                                                                                            | 52.51  | 0.5  | Isoflavones    |           |
| MOL003656 | Lupiwighteone                                                                                       | 51.64  | 0.37 | Isoflavones    |           |
| MOL004856 | Gancaonin A                                                                                         | 51.08  | 0.4  | Isoflavones    |           |
| MOL005001 | Gancaonin H                                                                                         | 50.1   | 0.78 | Isoflavones    |           |

|           |                                                                                           |       |      |             |  |
|-----------|-------------------------------------------------------------------------------------------|-------|------|-------------|--|
| MOL004848 | Licochalcone G                                                                            | 49.25 | 0.32 | Chalcones   |  |
| MOL004857 | Gancaonin B                                                                               | 48.79 | 0.45 | Isoflavones |  |
| MOL004827 | Semilicoisoflavone B                                                                      | 48.78 | 0.55 | Isoflavones |  |
| MOL004898 | (E)-3-[3,4-dihydroxy-5-(3-methylbut-2-enyl)phenyl]-1-(2,4-dihydroxyphenyl)prop-2-en-1-one | 46.27 | 0.31 | Chalcones   |  |
| MOL004949 | ILF                                                                                       | 45.17 | 0.42 | Flavonoids  |  |
| MOL004828 | Glepidotin A                                                                              | 44.72 | 0.35 | Flavonoids  |  |
| MOL004948 | Isoglycyrol                                                                               | 44.7  | 0.84 | Coumarin    |  |
| MOL004866 | 2-(3,4-dihydroxyphenyl)-5,7-dihydroxy-6-(3-methylbut-2-enyl)chromone                      | 44.15 | 0.41 | Flavonoids  |  |
| MOL004915 | Eurycarpin A                                                                              | 43.28 | 0.37 | Isoflavones |  |
| MOL004883 | LIA                                                                                       | 41.61 | 0.42 | Isoflavones |  |
| MOL000497 | LCA                                                                                       | 40.79 | 0.29 | Chalcones   |  |
| MOL004815 | Kanzonol B                                                                                | 39.62 | 0.35 | Chalcones   |  |
| MOL004884 | Licoisoflavone B                                                                          | 38.93 | 0.55 | Isoflavones |  |
| MOL004917 | Glycyroside                                                                               | 37.25 | 0.79 | Isoflavones |  |

|           |                                                                                |       |      |             |                                                                                     |
|-----------|--------------------------------------------------------------------------------|-------|------|-------------|-------------------------------------------------------------------------------------|
| MOL004905 | 3,22-Dihydroxy-11-oxo-delta(12)-oleanene-27-alpha-methoxy-carbonyl-29-oic acid | 34.32 | 0.55 | Triterpenes | 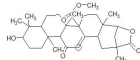 |
| MOL004864 | 5,7-dihydroxy-3-(4-methoxyphenyl)-8-(3-methylbut-2-enyl)chromone               | 30.49 | 0.41 | Isoflavones |  |

The ingredients of  $OB \geq 30\%$  and  $DL \geq 0.1$  in licorice. Bioavailability play a key role in the drug development period for both new drug products and their generic equivalents. High OB is usually a key indicator of bioactive molecules in judging. (chen et al, 2001). DL is widely used to assess the possibility of compounds becoming drugs. Screening high DL can eliminate the interference of non-pharmaceutical compounds and save the cost and time of drug research and development. (Walters and murcko, 2002). So we rank the OB and DL values from high to low, and the choice of compounds with high oral bioavailability and drug-like properties are very helpful to our drug development and research.
