# Supplementary material for: The Alexipharmic Mechanisms of Five Licorice Ingredients Involved in CYP450 and Nrf2 Pathways in Paraquat-Induced Mice Acute Lung Injury
Source: Hindawi journal article supplement (doi:10.1155/2019/7283104), 2019-04-28
Supplement: f1 [file 7283104.f1.zip]

Supplementary Table 2. MCODE scoring for PPI network

| Cluster | Score(Density*#Nodes) | Nodes | Edges | Node IDs                               |
|---------|-----------------------|-------|-------|----------------------------------------|
| 1       | 11.478                | 24    | 132   | BAX,NF-KAPPAB,IRF6,DIABLO,TNFSF10,etc. |
| 2       | 7                     | 7     | 21    | AFF4,RN7SK,AFF4,CDK9,DOT1L,NSD1,CARM1  |
| 3       | 6.75                  | 33    | 108   | TNFSF11,MUC3A,ERVK2,TP53,HMOX1,etc.    |
| 4       | 6                     | 6     | 15    | Sfrp1, DKK1, SFRP2, FRZB, SFRP4, DKK3  |
| 5       | 5.368                 | 20    | 51    | ERBB2,EOS,BAS,ABCG2,CYP2B6,CYP2C9,etc. |
| 6       | 5                     | 5     | 10    | CDKN1C,CDKN2A,CDKN2B,CDKN2C, etc.      |
| 7       | 5                     | 5     | 10    | C6, C3, C2, C7, C5                     |
| 8       | 5                     | 5     | 10    | NEUROG2,NT3,NEUROD2,GAD1,NEUROG1       |
| 9       | 5                     | 5     | 10    | ACOT2, HADHA, ECH1, ALDH2, CPS1        |
| 10      | 4.533                 | 31    | 68    | GABPA,UGT1A1,UGT1A8, CYP4A1, ETC.      |
| 11      | 4                     | 4     | 6     | PPP1R15A, XBP1, PDIA6, ATF4            |
| 12      | 4                     | 4     | 6     | GSK3B, 1.1.3.4, 2.7.1.64, HAO1         |
| 13      | 4                     | 4     | 6     | ABCB6, ABCG5, ABCG8, PCSK9             |
| 14      | 4                     | 4     | 6     | ROCK1, PPP1R12A, AGTR1, ANG            |
| 15      | 4                     | 4     | 6     | RAPGEF3, 3.1.4.3, HSPG2, RAP1A         |
| 16      | 4                     | 4     | 6     | AMOTL1, NRP1, ETS2, MIRN23B            |
| 17      | 4                     | 4     | 6     | GCLC, NQO1, GSTP1, NFE2L2              |
| 18      | 4                     | 4     | 6     | TCIRG1, OSTM1, CLCN7, CA2              |
| 19      | 4                     | 4     | 6     | NCOA1, FGR, NCOA3, CXADR               |
| 20      | 4                     | 4     | 6     | 6.2.1.12, 4.3.1.5, 1.14.13.11, LYST    |
| 21      | 4                     | 4     | 6     | GLP-1, GPR119, CCK, PYY                |
| 22      | 4                     | 4     | 6     | IMPDH2, MTG1, SLC25A1, CTPS            |
| 23      | 4                     | 4     | 6     | CCL21, SLCO1B1, SLCO1B3, POU2F1        |
| 24      | 3.333                 | 4     | 5     | ADIPOQ, CPT1A, SREBF1, UCP2            |
| 25      | 3.333                 | 4     | 5     | CYP2C19, CYP2D6, CYP2E1, CYP1A2        |
| 26      | 3.333                 | 4     | 5     | RBPJ, NOTCH1, MS4A1, HDAC9             |
| 27      | 3.333                 | 7     | 10    | RAC1,PTK2,RHOA,MYH14,PRKG1,JAG1, LPA   |
| 28      | 3.333                 | 7     | 10    | IGF1,ERBB3,PIK3R1,SLC2A4,MYOG,HLA-E,   |
